# Supplementary material for: The Efficacy of Mindfulness-Based Cognitive Therapy as a Public Mental Health Intervention for Adults with Mild to Moderate Depressive Symptomatology: A Randomized Controlled Trial
Source: PLoS One. 2014 Oct 15;9(10):e109789. doi: 10.1371/journal.pone.0109789 (PMC4198116; doi:10.1371/journal.pone.0109789)
Supplement: File S1 — Metadata file. (PDF) [file pone.0109789.s002.pdf]

## Details dataset

### Title Dataset

Dataset Pots et al\_MBCT as a public mental health intervention\_PlosOne\_24072014

### Creators

W.T.M. Pots, P.A.M. Meulenbeek, M.M. Veehof, J. Klungers, E.T. Bohlmeijer

### Contact information

W.T.M. Pots  
University of Twente  
Department of Psychology, Health & Technology  
Drienerlolaan 5, PO Box 217, 7500 AE,  
Enschede, The Netherlands.

### Persistent Identifier

urn:nbn:nl:ui:13-6gd4-iv

### Data Citation

When using this data, please cite the dataset and the original article.

Citation dataset: Pots, W.T.M. (2011). The efficacy of mindfulness-based cognitive therapy as a public mental health intervention for adults with mild to moderate depressive symptomatology: a Randomized Controlled Trial. [Data file and Metadata file]. Online archiving system DANS-EASY. Persistent Identifier: urn:nbn:nl:ui:13-6gd4-iv

### Location (repository)

DANS-EASY (<http://easy.dans.knaw.nl>)

### Deposit Date

29-7-2014

### Related publications

These data underlie the paper:

Pots WTM, Meulenbeek PAM, Veehof MM, Klungers J, Bohlmeijer ET (2014). The efficacy of mindfulness-based cognitive therapy as a public mental health intervention for adults with mild to moderate depressive symptomatology: a Randomized Controlled Trial. PLOS ONE (submitted)

### Subject

A community-based MBCT intervention for adults with mild to moderate depressive symptomatology.
